# Supplementary material for: Altered desferrioxamine-mediated iron utilization is a common trait of bald mutants of Streptomyces coelicolor
Source: Royal Society of Chemistry journal article supplement (doi:10.1039/c4mt00068d), 2014-01-01
Supplement: c4mt00068d1.pdf [file c4mt00068d1.pdf]

*S. coelicolor*  
M145

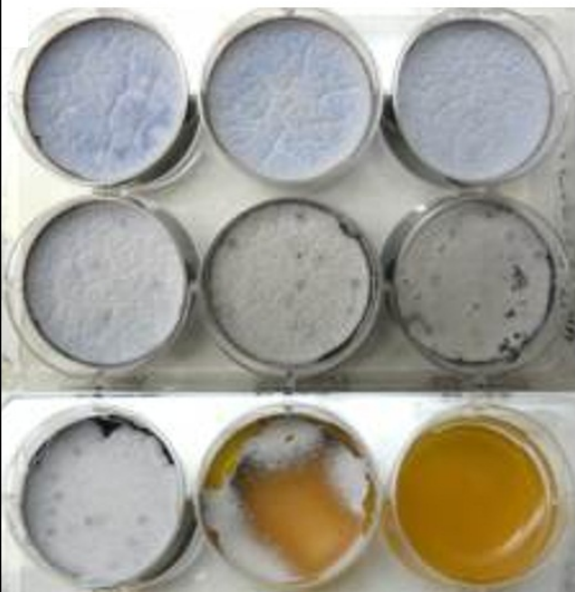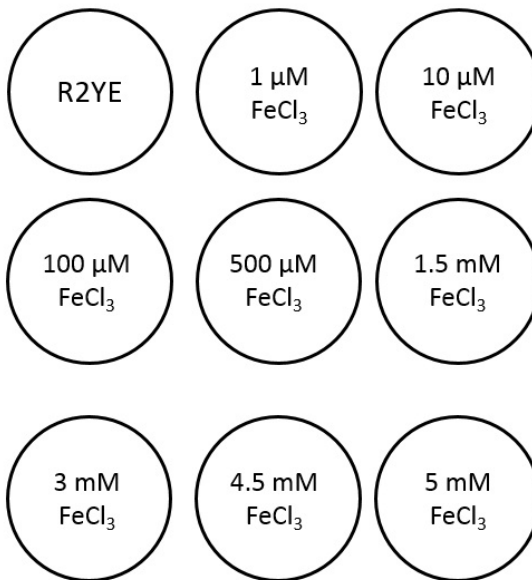

**Fig. S1.** Effect of increasing concentrations of FeCl<sub>3</sub> on growth of *S. coelicolor* M145 (parental strain) when streaked on the R2YE medium. Note that the addition of 5 mM FeCl<sub>3</sub> is lethal for the parental strain M145.
