# Supplementary material for: Altered desferrioxamine-mediated iron utilization is a common trait of bald mutants of Streptomyces coelicolor
Source: Royal Society of Chemistry journal article supplement (doi:10.1039/c4mt00068d), 2014-01-01
Supplement: c4mt00068d2.pdf [file c4mt00068d2.pdf]

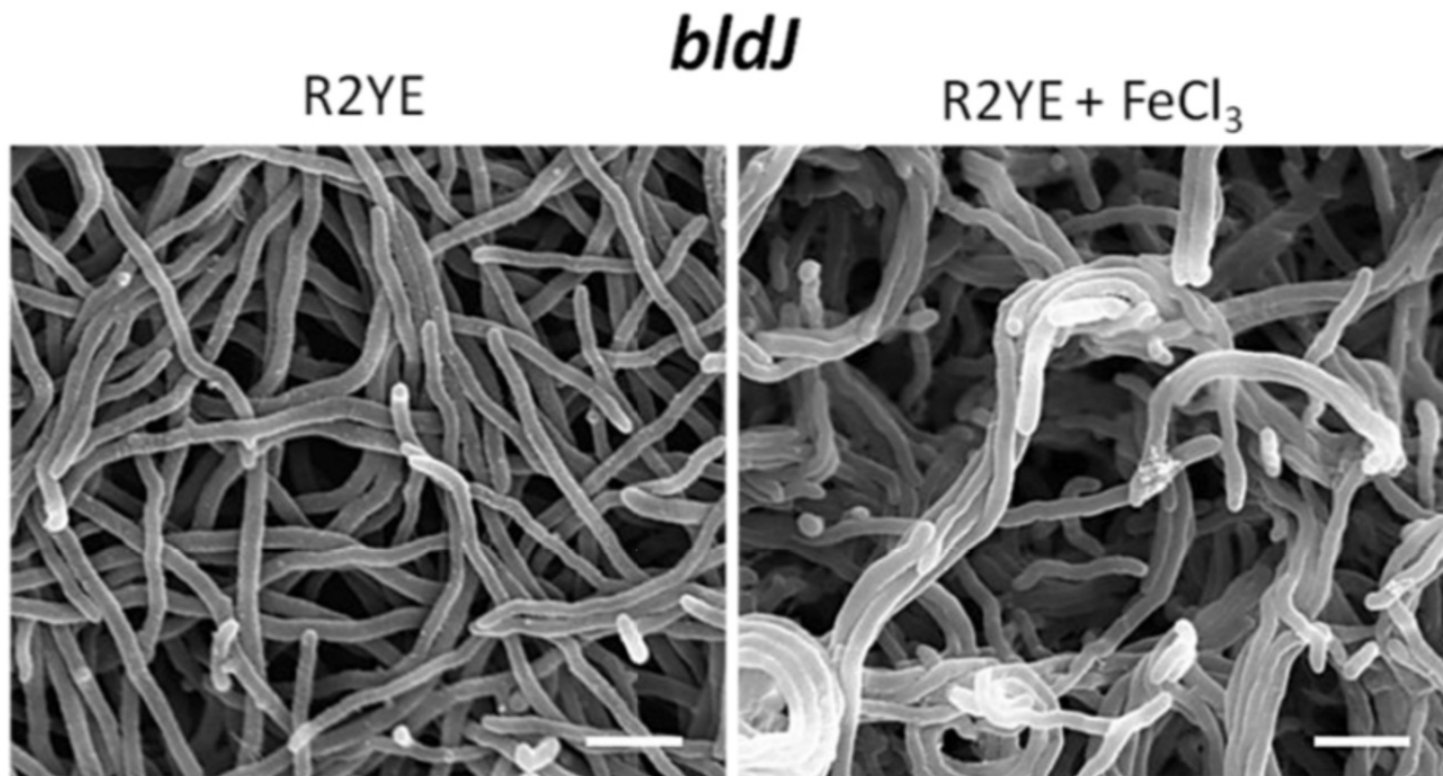

**Fig. S2.** Effect of FeCl<sub>3</sub> on development of the *bldJ* mutant after five days of growth. Note that the sporulation is not fully restored and that many of the aerial hyphae are stuck one to each other.
